# Supplementary material
Source: PubMed Central journal article supplement (PMC4001375)
Supplement: supp_tpc.113.121061_tpc121061Supplemental.pdf [file supp_tpc.113.121061_tpc121061Supplemental.pdf]

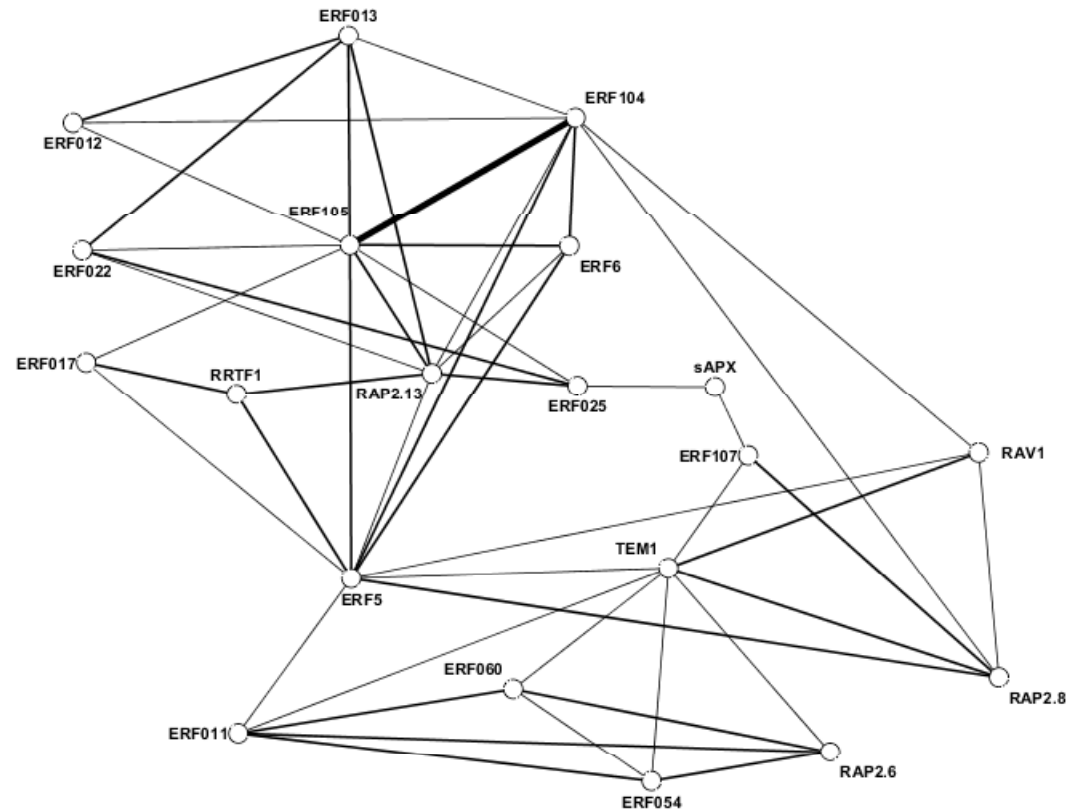

**Supplemental Figure 1: Potential H-light responsive co-expression network of AP2/ERF-TFs.**

The co-expression network of AP2/ERF-TFs was constructed with two co-expression tools, ACT (Manfield *et al.*, 2006) and ExpressionAngler (Toufighi *et al.*, 2005). The network consists of 19 AP2/ERF-TFs and the *sAPX* as HL-responsive gene. The thickness of the lines corresponds to the degree of co-expression. The cut-off of interaction was set to Pearson value  $r=0.4$ . Overall 29 interactions were medium ( $0.5 > r > 0.7$ ) or strong ( $r > 0.7$ ) and 21 weak ( $0.4 > r < 0.5$ ).

| ID        | Target  | N→H transfer (min) |        |        |        |        |        | Group |
|-----------|---------|--------------------|--------|--------|--------|--------|--------|-------|
|           |         | 0                  | 10     | 30     | 60     | 180    | 360    |       |
| At1g25560 | TEM1    | Red                | Red    | Yellow | Orange | Yellow | Orange | I     |
| At5g61590 | ERF107  | Red                | Red    | Yellow | Yellow | Yellow | Yellow |       |
| At5g52020 | ERF025  | Orange             | Orange | Yellow | Yellow | Yellow | Yellow | II    |
| At1g43160 | RAP2.6  | Yellow             | Yellow | Yellow | Red    | Orange | Orange |       |
| At1g13260 | RAV1    | Red                | Orange | Orange | Orange | Yellow | Yellow |       |
| At4g39780 | ERF060  | Red                | Orange | Orange | Orange | Red    | Orange | III   |
| At4g28140 | ERF054  | Red                | Yellow | Orange | Yellow | Yellow | Yellow |       |
| At3g50260 | ERF011  | Orange             | Red    | Orange | Orange | Yellow | Yellow | IV    |
| At5g51190 | ERF105  | Yellow             | Red    | Orange | Yellow | Yellow | Yellow |       |
| At1g33760 | ERF022  | Yellow             | Red    | Yellow | Orange | Yellow | Yellow |       |
| At1g21910 | ERF012  | Red                | Red    | Yellow | Orange | Yellow | Yellow |       |
| At5g61600 | ERF104  | Yellow             | Red    | Yellow | Yellow | Yellow | Yellow |       |
| At1g68840 | RAP2.8  | Orange             | Red    | Yellow | Yellow | Yellow | Yellow |       |
| At1g77640 | ERF013  | Orange             | Red    | Yellow | Orange | Yellow | Yellow |       |
| At4g17490 | ERF6    | Orange             | Red    | Yellow | Yellow | Yellow | Yellow |       |
| At4g34410 | RRTF1   | Yellow             | Red    | Yellow | Yellow | Yellow | Yellow |       |
| At5g47230 | ERF5    | Orange             | Orange | Yellow | Yellow | Yellow | Yellow |       |
| At1g22190 | RAP2.13 | Orange             | Red    | Red    | Yellow | Orange | Orange |       |
| At1g19210 | ERF017  | Yellow             | Red    | Yellow | Yellow | Yellow | Yellow |       |

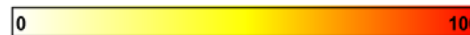

**Supplemental Figure 2: Transcript regulation of AP2/ERF-TFs in N-light grown plants in response to H-light treatment.**

The network members as classified above in Fig. 1A were analyzed for transcript levels in dependence on time after the N→H shift. The data are means of 3 independent experiments with duplicate determinations by RT-PCR.

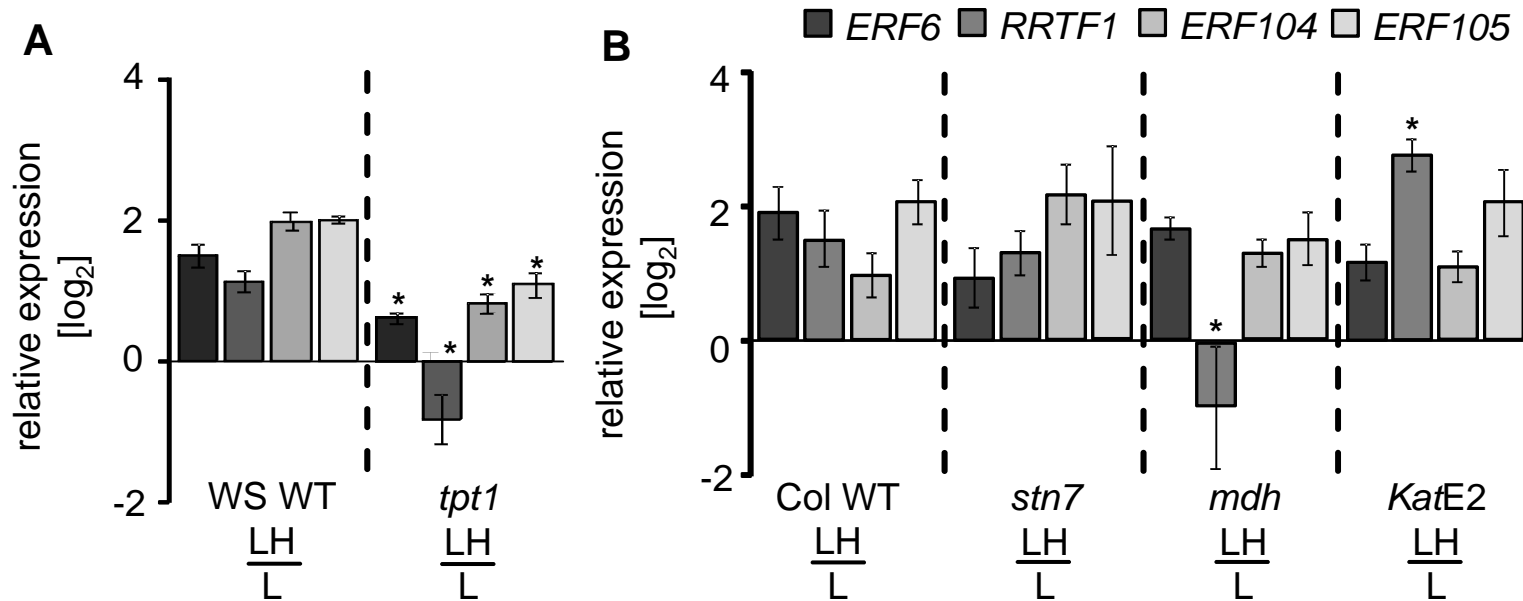

**Supplemental Figure 3: Comparison of AP2/ERF-TF transcript levels in wildtype plants and mutants.** *ERF6*, *RRTF1*, *ERF104* and *ERF105* transcript levels were quantified in wildtype plants and mutants defective in retrograde signalling pathways 10 min following the L→H-transfer. (A) Comparison between *tpt1* (Wassilewskija background) with Wassilewskija wildtype (WS WT) (B) Comparison between Columbia wildtype (Col WT), *stn7*, *mdh* and *KatE2*. and Col WT. Data represent ratios of transcript levels in L→H-plants relative to L-light-samples. (qPCR, n=3 independent experiments with duplicate determinations, mean±SE, asterisks indicate significant difference to the wildtype transcript level, Student's t-test p<0.05).

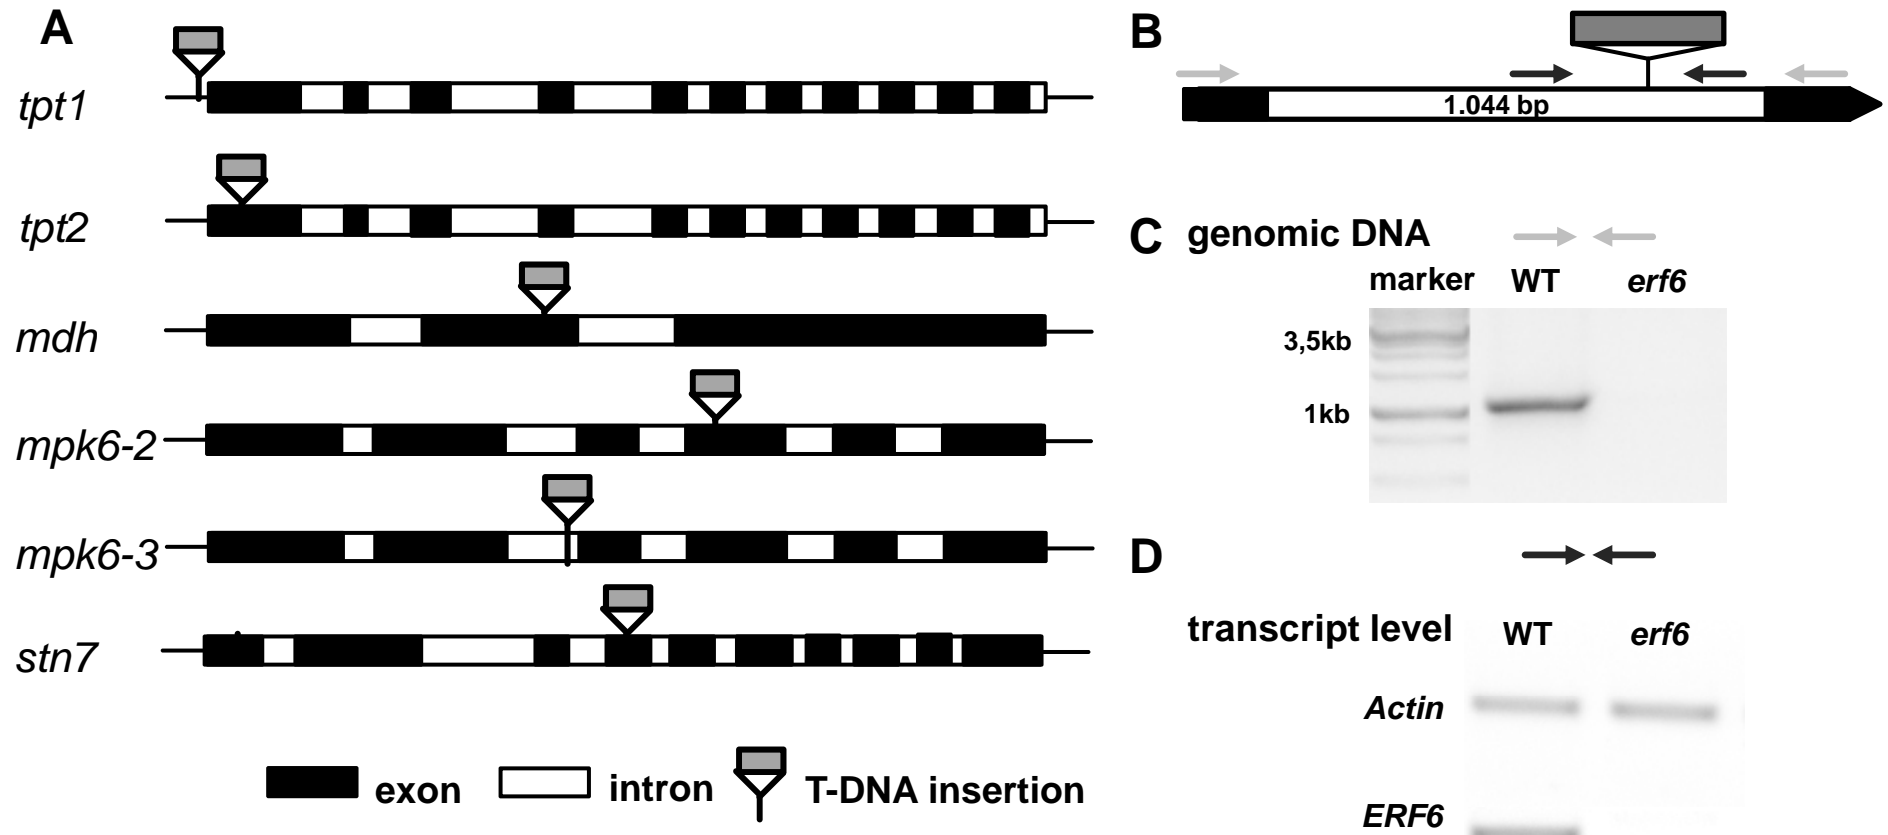

**Supplemental Figure 4: Schematics of T-DNA insertion sites of mutants used in this paper, and genetic confirmation of the *erf6* insertion mutant.** (A) Schematics of T-DNA insertion sites in *tpt1*, *tpt2*, *mdh*, *mpk6-2*, *mpk6-3* and *stn7*. These mutants have been characterized in the respective publications as cited in the text. (B) Schematic view of the *ERF6* gene and position of used primers for confirmation PCRs. (C) Genomic DNA was used as template for PCR. The expected band of ~1 kb was detected in wildtype (WT) but not in the mutant. (D) A product could not be amplified in the *erf6* mutant following RNA isolation, cDNA-synthesis and subsequent RT-PCR with gene specific primers.

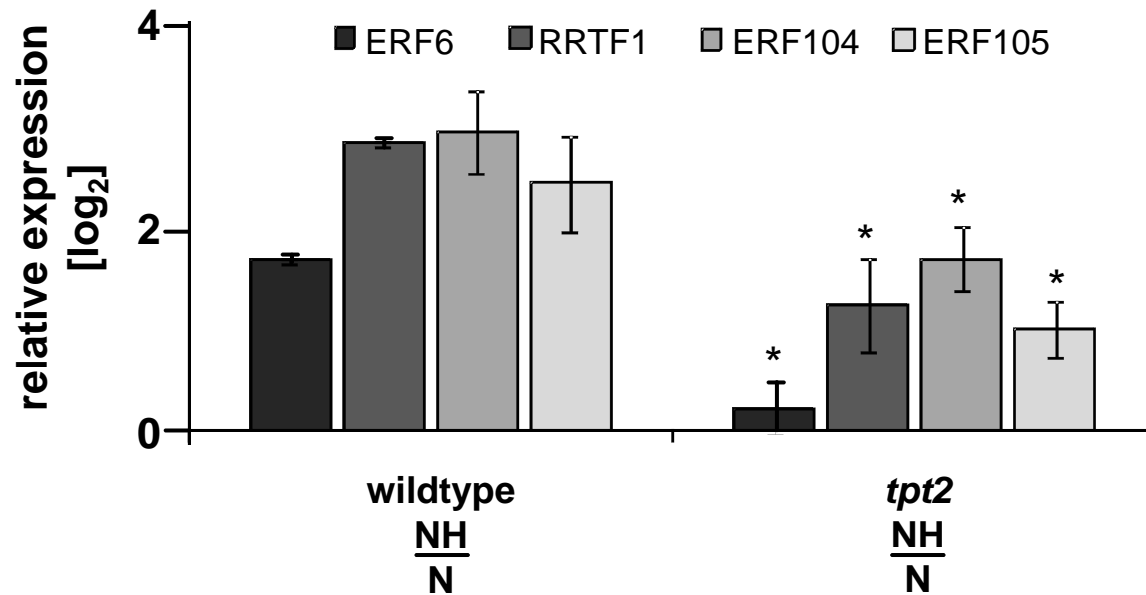

**Supplemental Figure 5: Transcript abundances of AP2/ERF-TFs after 10 min of N→H in wildtype and *tpt2* mutant.** To exclude possible starvation effects in L-light, transcript levels of the selected AP2/ERF-TFs were analyzed at t=10 min of N→H shift in the wildtype and the *tpt2* mutant. Deregulation as detected upon the L→H shift was observed for all selected TFs also in N→H shifted plants (qPCR, n=3 independent experiments with duplicate determinations, mean±SE, asterisks indicate significant difference, Student's t-test p<0.05).

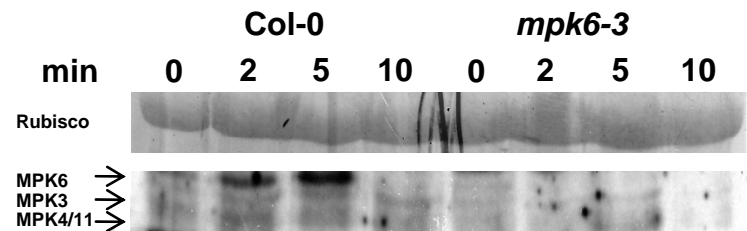

**Supplemental Figure 6: Comparison of phosphorylation state of different MAPKs in wildtype and *mpk6* mutant plants.** A representative immunoblot shows the assessment of phosphorylated MPK3, 4, 6 and 11 at different time points of L→H treatment. An increase of the phosphorylation state was observed for the MPK6 in wildtype but not in the *mpk6-3* mutant. Furthermore, no distinct activation was seen for the other detected MAPKs in both types of plants.

**SFigure 7: Vogel et al.**

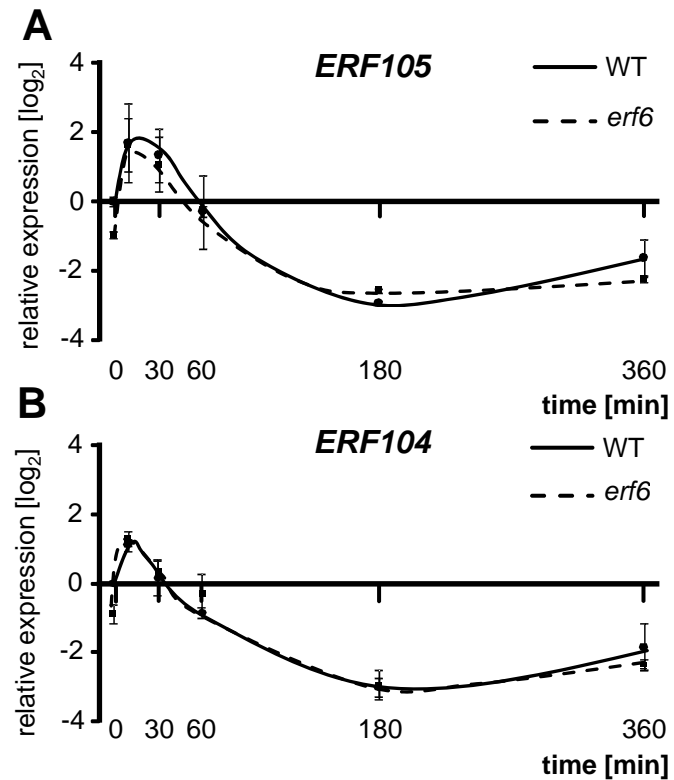

**Supplemental Figure 7: L→H-light response of ERF104 and ERF105 transcript level in *erf6* mutant. *ERF104* and *ERF105* display high Pearson co-regulation coefficients to *ERF6* ( $r=0.665$  and  $r=0.704$ ). The RNA-levels of both AP2/ERF-TFs were similar in WT and *erf6* mutant during 6 hours of L→H stress ( $n=3$  and 4 independent experiments with duplicate determinations, mean $\pm$ SE).**

**Supplemental Table 1: Results of the single Chip hybridization.** Hybridization was done with WT Col0 and *erf6* mutants at t=30 min of L→H shift.

| Affymetrix Probeset ID | AT ID (gene locus) | Normalized log <sub>2</sub> value WT | Normalized log <sub>2</sub> value <i>erf6</i> mutant | Log <sub>2</sub> fold change | Annotation                        |
|------------------------|--------------------|--------------------------------------|------------------------------------------------------|------------------------------|-----------------------------------|
| 256940_at              | At3g30720          | 7.673209                             | 10.29516                                             | 2.621949                     | unknown protein                   |
| 248668_at              | At5g48720          | 5.671278                             | 7.119067                                             | 1.447788                     | unknown protein                   |
| 255500_at              | At4g02390          | 6.272786                             | 7.667199                                             | 1.394413                     | NAD+ ADP-ribosyltransferase       |
| 261065_at              | At1g07500          | 5.232255                             | 6.622111                                             | 1.389856                     | hypothetical protein              |
| 252539_at              | At3g45730          | 5.767702                             | 6.991127                                             | 1.223426                     | putative protein                  |
| 255872_at              | At2g30360          | 5.712693                             | 6.913678                                             | 1.200985                     | CBL inter. protein kinase 11      |
| 262719_at              | At1g43590          | 4.496756                             | 5.583848                                             | 1.087092                     | hypothetical protein              |
| 247615_at              | At5g60250          | 4.382606                             | 5.444821                                             | 1.062216                     | putative protein                  |
| 246884_at              | At5g26220          | 5.886007                             | 4.880385                                             | -1.005622                    | putative protein cation transport |
| 254832_at              | At4g12490          | 6.373779                             | 5.358045                                             | -1.015734                    | pEARLI 1-like protein             |
| 250296_at              | At5g12020          | 9.075039                             | 7.99411                                              | -1.080929                    | heat shock protein 17.6-II        |
| 260556_at              | At2g43620          | 5.521255                             | 4.399725                                             | -1.12153                     | putative endochitinase            |
| 261838_at              | At1g16030          | 7.815173                             | 6.682122                                             | -1.13305                     | heat shock protein hsp70          |
| 260978_at              | At1g53540          | 8.936294                             | 7.593398                                             | -1.342896                    | 17.6 kDa heat shock protein       |
| 264960_at              | At1g76930          | 5.201322                             | 3.808407                                             | -1.392915                    | extensin1                         |
| 252265_at              | At3g49620          | 6.457196                             | 4.425243                                             | -2.031953                    | putative protein SRG1 protein     |
| 266385_at              | At2g14610          | 7.313099                             | 5.247048                                             | -2.066051                    | pathogenesis-related PR-1-like    |
| 250824_at              | At5g05200          | 10.32994                             | 8.023967                                             | -2.305968                    | chloroplast protein kinase-like   |



**Supplemental Table 2: Primers**

| Target gene   | ID number | Forward Sequence (5' – 3')         | Reverse Sequence (5' – 3')       | T <sub>A</sub> (°C) |
|---------------|-----------|------------------------------------|----------------------------------|---------------------|
| RAV1          | At1g13260 | GATTCAGAGAACGGCGTAGA               | CTTCGTCCATCTTCACGTCT             | 61                  |
| ERF013        | At1g77640 | GATCACCATCCATCTGCTTC               | CATCGTTGCCTCTGAGCTAT             | 61                  |
| ERF017        | At1g19210 | GACGTAACCTGTCGCGATCT               | AACGATCACCGGAGTATTCA             | 58                  |
| ERF012        | At1g21910 | AACCATTTTGCCCTACTTC                | GCATCGTCGTGCGAGTTTAGT            | 61                  |
| RAP2.13       | At1g22190 | TTCCCTGATCTCCGTCATAA               | ATCTCCTCCTCCGTATCACC             | 58                  |
| TEM1          | At1g25560 | CCGATGAGTTTGAGCAGAGT               | TAATCAAAACGCCTTTCGTC             | 63                  |
| RAP2.6        | At1g43160 | ATGGTGTCTATGCTGACTAATGTTG          | AGACTGAAGTTGTATTGGGACAGAA        | 61                  |
| ERF022        | At1g33760 | TGTCCTACAGAGGCATTCGT               | TGTGCTCCGAAGTAGAGCTT             | 62                  |
| HSP20-like    | At1g53540 | ATTTACCGGGACTGAGGAAG               | AACCGACAACACACCATTTT             | 68                  |
| RAP2.8        | At1g68840 | CGGCGATTTAGCTTTTCTTG               | CACGAGACGGTTTAGCTTCC             | 58                  |
| EXT1          | At1g76930 | CACCACCCAAGAAGCACTAC               | AATTCTCCCGTCAACGATCT             | 61                  |
| PR1           | At2g14610 | CCTTACGGGGAAAACCTTAGC              | CATAATCCCACGAGGATCA              | 56                  |
| CIPK          | At2g30360 | CCGTGAAAATCCTCAACAAG               | CTTCGCTAAGACGTCCATGT             | 56                  |
| CHFP          | At2g43620 | TGGCTACCCTAAGAGCAATG               | GTGGGATAGGTGTGGTTGAG             | 58                  |
| MPK6          | At2g43790 | GCTCATGGAGCTCATAGGAA               | GCCAATGCGTCTAAAACGT              | 58                  |
| Actin2        | At3g18780 | TTGGTAGGCCAAGACATCAT               | GGAGCCTCGGTAAGAAGAAC             | 58                  |
| CEJ1          | At3g50260 | ACAAGCGTTCAAGACTTTGG               | CCCCTATCGCATCTACTTGA             | 63                  |
| ERF6          | At4g17490 | TGAAACCAAACCGGAAATAA               | TCTCCTCTGCTGCTACAACC             | 58                  |
| ERF054        | At4g28140 | TCGTTAGAGGCTTCCCTTT                | CTTCGTTGCGATGTAAGGTT             | 61                  |
| RRTF1         | At4g34410 | GAAGGATGTCTCGGCTGTAA               | ACACGTGTGGCTCTTTTAGG             | 61                  |
| ERF060        | At4g39780 | CATGACCGCTCAGAACTCT                | CCGTAGTATCCATCCTCGTG             | 61                  |
| ChIPK-like    | At5g05200 | GAACGCATGGGAGCTACTTA               | ATTGGCGTAGGGTCAACATA             | 56                  |
| ERF5          | At5g47230 | CCGATGAAGGTGAGAAGAAA               | CAACTGGGAATAACCAAACG             | 61                  |
| ERF105        | At5g51190 | TTAGACACCTTTGCCTCCAC               | CCTAACCAGACACGAACACC             | 61                  |
| ERF025        | At5g52020 | AATTTGGCTCGGGACTTATC               | ACCGGTTCCAATACCTTCTC             | 60                  |
| ERF107        | At5g61590 | TGAGGAAAGCTCTGATTTGG               | ACCTCAGGTGACGTTGTTGT             | 61                  |
| ERF104        | At5g61600 | TACAGGGGAGTGAGACGAAG               | ACCCTTATCTCGCTTTCGTT             | 61                  |
| SAIL 1236 H11 | At4a17490 | GCCTTTTCAGAAATGGATAAATAGCCTTGCTTCC | CAAACCTAGGATAAATTATCGCGCGCGGTGTC | 58                  |

## References from supplemental materials:

- Manfield IW, Jen CH, Pinney JW, Michalopoulos I, Bradford JR, Gilmartin PM, Westhead DR (2006)** Arabidopsis Co-expression Tool (ACT): web server tools for microarray-based gene expression analysis. *Nucleic Acids Res* 34:W504–W509
- Toufighi K, Brady SM, Austin R, Ly E, Provat NJ (2005)** The Botany Array Resource: e-Northern, Expression Angling, and promoter analyses. *Plant J.* 43: 153-63.
